# Supplementary material
Source: publisher figshare collection journal article supplement (https://frontiersin.figshare.com/ndownloader/files/13849250)
Supplement: Supplementary file [file 13849250]

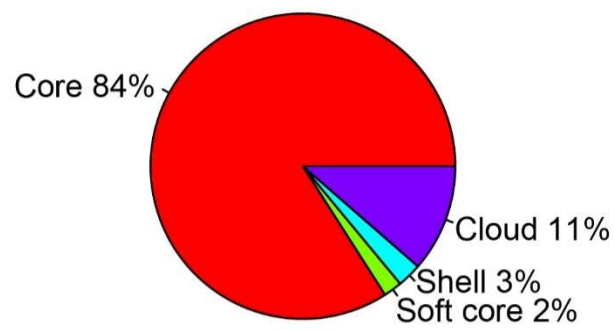

**Supplementary Figure 3** | Proportion of different types of genes in the pangenome of 147 *M. tuberculosis* genomes.
